# The Anesthesiologist's Bookshelf

Edited by HUBERTA M. LIVINGSTONE, M.D.

**A Primer of Peripheral Vascular Disease.** By TRAVIS WINSON, M.D., F.A.C.P., Associate Clinical Professor of Medicine, AND CHESTER HYMAN, Ph.D., Professor of Medicine and Physiology, University of Southern California, Los Angeles. Cloth. \$12.50. Pp. 348, with 132 illustrations. Lea and Febiger, Philadelphia, 1965.

For anesthesiologists who are engaged in therapeutic and diagnostic nerve blocking, this book is highly recommended. The subject of peripheral vascular diseases is handled in a simple and lucid manner. The content ranges from the basic physiological factors through the various types of diagnostic procedures, as well as a description of the major vascular problems. Therapy at best, of course, is limited; that which is currently acceptable is well presented.

Particular chapters which should be recommended to the reader are those related to the regulation of vascular smooth muscle tone, physical concepts relating to the flow of fluid in vessels, and the morphology of peripheral blood vessels. The current concepts regarding the coagulation of blood are quite simple and are factually presented.

Among the diseases discussed, both thromboangitis obliterans and localized arteritis and collagen problems are noteworthy. The anesthesiologist will benefit a great deal by perusal of the chapter on neurovascular syndromes and post-traumatic dystrophies.

The style of the authors is crisp and quite readable. The avoidance of long complex sentences is especially noteworthy. The book, furthermore, is profusely illustrated. The methods of treatment are up-to-date in so far as the general medical management is concerned. There is a paucity of both theoretic consideration and practical application of therapeutic nerve blocking. However, this might well be expected since the basic objective of the authors is to present the disease entities.

The primer is to be considered a book worthy of a place in the anesthesiologist's library for both reference and specific use.

VINCENT J. COLLINS, M.D.

**Heart Disease in Children. Diagnosis and Treatment.** By BENJAMIN M. GASUL, M.D., Late Professor of Pediatrics, Cook County Post Graduate School; RENÉ A. ARCILLA, M.D., Assistant Professor of Pediatrics, University of Chicago, AND MAURICE LEV, M.D., Director Congenital Heart Research & Training Center, Hektoen Institute for Medical Research, Chicago. Cloth. \$33.00. Pp. 1,363, with 546 illustrations. J. B. Lippincott Co., Philadelphia and Toronto, 1966.

This most excellent volume of 1,332 pages plus 30 pages of index is comprehensive in its coverage of congenital heart disease. The first portion describes the anatomy, embryology and pathology of the normal heart and of congenital deformities.

Following the early basis, each chapter (there are 50) describes completely and elaborately for each type of congenital anomaly the following aspects of the disease: Pathology, Hemodynamic Considerations, Clinical Features, Roentgenology, ECG, Cardiac Catheterization, Angiography, Diagnosis and Differential Diagnosis, Treatment and Prognosis. Many figures and roentgenograms enable the authors to present exceptionally clear concepts.

The chapter on rheumatic fever uses the same headings. Only 19 pages are devoted to treatment and prevention of rheumatic fever. The last two chapters contain about 50 pages dealing with general management of cardiac patients.

The book is a compendium of material on congenital cardiac disease. It could well serve as a text for graduate training in such a course, and is recommended to anyone for a basic knowledge of congenital cardiac disease.

The physical characteristics of this publication are good. The type is easily read and the lettering of illustrations is sufficiently large for ease of perusal. The style is consistently interesting throughout, in spite of there being 15 authors.

ROBERT W. VIRTUE, M.D.

**Progress in Biochemical Pharmacology. Vol. 1. First International Symposium on Radiosensitizers and Radioprotective Drugs, Milan, 1964.** Edited by R. PAOLETTI AND R. VIRTUA. Cloth. \$28.50. Pp. 750, with 287 illustrations. Butterworth, Washington, D. C., 1965.

This symposium was organized by the European Society for Biochemical Pharmacology and its
